# Supplementary material
Source: MDPI journal article supplement (https://www.mdpi.com/2072-4292/8/12/988)
Supplement: s1 [file s1]

# Supplementary Materials: Flow Routing for Delineating Supraglacial Meltwater Channel Networks

Leonora King, Marwan A. Hassan, Kang Yang and Gwenn Flowers

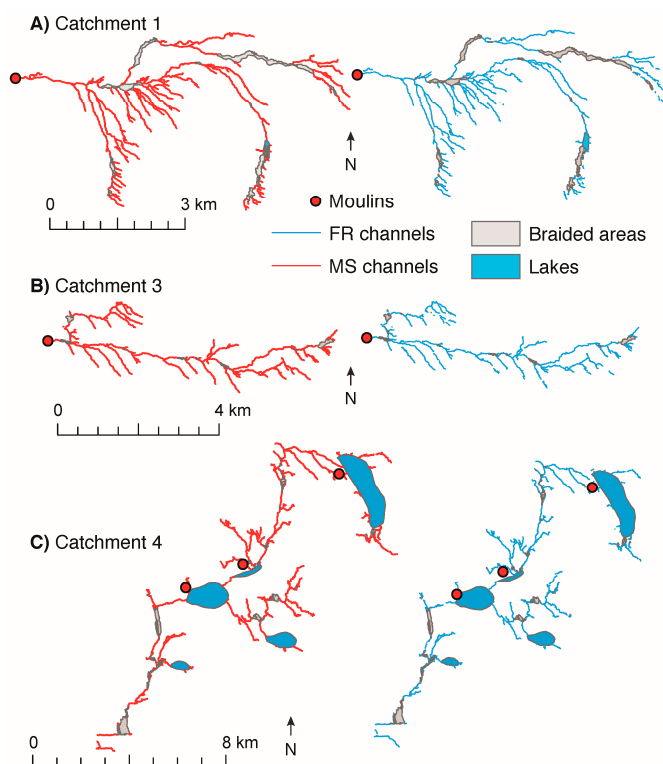

**Figure S1.** MS and FR datasets for Catchments 1, 3 and 4.

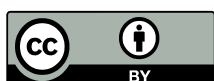

© 2016 by the authors; licensee MDPI, Basel, Switzerland. This article is an open access article distributed under the terms and conditions of the Creative Commons Attribution (CC-BY) license (<http://creativecommons.org/licenses/by/4.0/>).
